# Supplementary material
Source: PubMed Central journal article supplement (PMC5984511)
Supplement: pnas.1722024115.sapp.pdf [file pnas.1722024115.sapp.pdf]

**SI Appendix: Why We Need to Look Beyond the Glass  
Transition Temperature to Characterize the Dynamics of Thin  
Supported Polymer Films**

Wengang Zhang,<sup>1,2</sup> Jack F. Douglas<sup>a,1</sup> and Francis W. Starr<sup>2</sup>

<sup>1</sup>*Materials Science and Engineering Division,  
National Institute of Standards and Technology, Gaithersburg, Maryland 20899*

<sup>2</sup>*Department of Physics, Wesleyan University,  
Middletown, Connecticut 06459-0155*

(Dated: April 19, 2018)

---

<sup>a</sup> Contribution of the National Institute of Standards and Technology - Work not subject to copyright in the United States

## I. DETAILS ON MOLECULAR MODELING AND SIMULATIONS

Polymers are modeled as unentangled chains of 10 beads linked by harmonic springs. We use the harmonic spring potential

$$U_{\text{bond}} = \frac{k_{\text{chain}}}{2}(r - r_0)^2$$

to connect nearest-neighbor monomers within a polymer chain. The equilibrium bond length is  $r_0 = 0.9$  and the spring constant is  $k_{\text{chain}} = 1111$  [1]. To inhibit crystallization of the film, we choose  $r_0$  smaller than that chosen in Ref. 2. We use the same substrate model as that in Ref. 3 for all the films studied. The substrate consists of 528 particles arranged in a triangular lattice (the (111) face of an FCC lattice). We tether substrate particles via a harmonic potential

$$V_{\text{sub}}(r) = (k/2)(r - r_0)^2,$$

where  $r_0$  is the ideal lattice position and  $k = 50$  is the spring constant [4, 5]. We use Lennard-Jones (LJ) interactions between non-bonded monomers and substrate particles. The interactions are truncated at pair separations  $2.5\sigma_{ij}$ , where  $\sigma$  is equivalent to the particle diameter in the LJ potential, and the subscript  $ij$  indicates the possible combinations of interactions ( $ss$  substrate-substrate,  $ps$  polymer-substrate,  $pp$  polymer-polymer). The LJ parameters are  $\sigma_{pp} = 1.0$ ,  $\varepsilon \equiv \varepsilon_{pp} = 1.0$ ,  $\sigma \equiv \sigma_{ps} = 1.0$ ,  $\sigma_{ss} = 0.8$ ,  $\varepsilon_{ss} = 1.0$ , and we use interaction strengths between monomers and substrate particles  $\varepsilon_{ps} = 0.1, 0.25, 0.5, 0.75, 1.0, 1.25, 1.5, 2.0, 2.5$ , and  $3.0$ . Since we only vary  $\varepsilon_{ps}$ , we simply refer to this quantity as  $\varepsilon$ .

Periodic boundary conditions are used in the directions parallel to the substrate with a box length  $19.76\sigma$  (determined by the lattice spacing of the triangular lattice substrate). We conducted all simulations using the LAMMPS [6] simulation package with a time step  $dt = 0.002$ . For cooling and heating simulations of the bulk polymers, we use an  $NPT$  ensemble at  $P = 0$ . We performed at least 3 independent heating and cooling runs for both the pure polymer and polymer films at the same rate  $10^{-5}$ . To generate trajectories from which we study the dynamics at fixed  $T$ , we carry out  $NPT$  simulations starting from configurations taken from the heating runs at  $T > T_g$  with pressure  $P = 0$ . For the supported polymer films, we use an  $NVT$  ensemble where the box dimension in the  $z$ -direction is large compared to the film thickness. The temperatures are varied from 0.45 to 0.65, above (the heating rate dependent)  $T_g(h = 15) \approx 0.40$  of the thickest polymer film. We equilibrate

each trajectory for at least 100 times the overall polymer relaxation time  $\tau_{\text{overall}}$ .

## II. DETAILS ON THERMODYNAMIC DEFINITIONS OF $T_g$

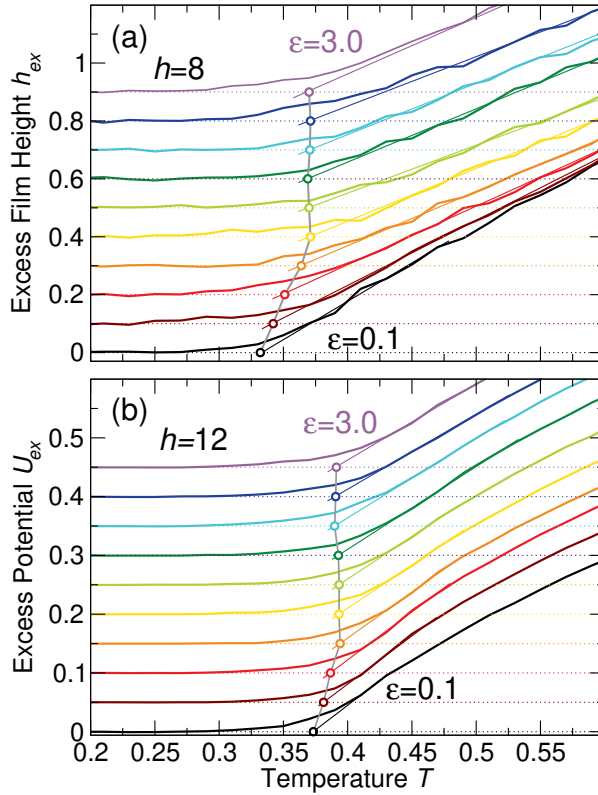

FIG. S1: The excess film height  $h_{\text{ex}}(T)$  (a) and excess potential energy  $U_{\text{ex}}(T)$  (b) of thin polymer films for all polymer-substrate interaction strengths  $\epsilon = 0.1, 0.25, 0.5, 0.75, 1.0, 1.25, 1.5, 2.0, 2.5, 3.0$  (from bottom to top). For each  $\epsilon$ , the film height is averaged over at least 3 independent runs. The circles are the resulting  $T_g$  for each  $\epsilon$ . Each curve (except for  $\epsilon = 0.1$ ) is shifted vertically for clarity in the figure.

We first explain how we obtain thermodynamic estimates of  $T_g$  from film thickness or potential energy. To estimate  $T_g$  by a method comparable to ellipsometry measurements, we evaluate the temperature dependence of film thickness  $h(T)$  on heating. To determine results comparable to DSC measurements, we evaluate the  $T$ -dependence of potential energy  $U(T)$  during heating. We collect both  $U(T)$  and  $h(t)$  from heating supported polymer films at a fixed rate of  $10^{-5}$  for all  $\epsilon$  and  $h$  studied starting from  $T = 0.01$ . Note that this rate is substantially faster than rates used experimentally, and our  $T_g$  estimate is thus significantly

higher than would be reported experimentally. However, it is expected that  $T_g$  changes will be comparable in both simulation and experiment. In the glass regime below  $T \lesssim 0.25$ ,  $U(T)$  is well described by a quadratic function, and  $h(T)$  is well described by a linear function. The quadratic behavior of  $U_{\text{glass}}$  corresponds to the commonly observed linear temperature dependence of specific heat in the glass state; the linear behavior of film height in the glass regime is also commonly observed in experiments. To eliminate this trivial dependence of potential energy and thickness on the temperature in the glass, we focus on the  $T$ -dependence of excess film height relative to the glass,

$$h_{\text{ex}}(T) = h(T) - h_{\text{glass}}(T), \quad (1)$$

shown in Fig. S1 (a), and excess potential energy relative to the glass,

$$U_{\text{ex}}(T) = U(T) - U_{\text{glass}}(T), \quad (2)$$

shown in Fig. S1 (b). We define  $T_g$  as the vanishing temperature  $h_{\text{ex}}(T_g) \rightarrow 0$  or  $U_{\text{ex}}(T_g) \rightarrow 0$  from a linear extrapolation of the  $T$  dependence of  $h_{\text{ex}}(T)$  and  $U_{\text{ex}}(T)$  in the fluid state, as indicated by the fits in the Fig. S1. Notably,  $T_g$  for all films is reduced compared to that of the bulk polymer. It is also noteworthy that the breadth of the glass transition region grows with increasing substrate interaction strength, an effect that is also observed experimentally [7, 8].

### A. Local Thermodynamic $T_g$

As a complement to the dynamical estimates of  $T_g$  in the different regions (free interface  $T_g^{\text{int}}$ , middle layer  $T_g^{\text{mid}}$ , and substrate layer  $T_g^{\text{sub}}$ ) of the film discussed in the main text, we have also evaluated the thermodynamically defined  $T_g$  in the corresponding regions. The specific definitions of these regions are given in the main paper. We use the same methods to define  $T_g$  as described in the text above, except that we only examine the potential energy of that specific layer (free interface, middle layer, and substrate layer), defined by the pair potential energy within the region. The resulting  $T_g$  estimates from the potential energy are shown in Fig. S2. The local thermodynamic estimates of  $T_g$  in the substrate and middle layer decrease with decreasing film thickness and  $T_g$  of the free interface ( $T_g^{\text{int}}$ ) remains nearly a constant with film thickness, consistent with the findings in Ref. [9]. As a result,

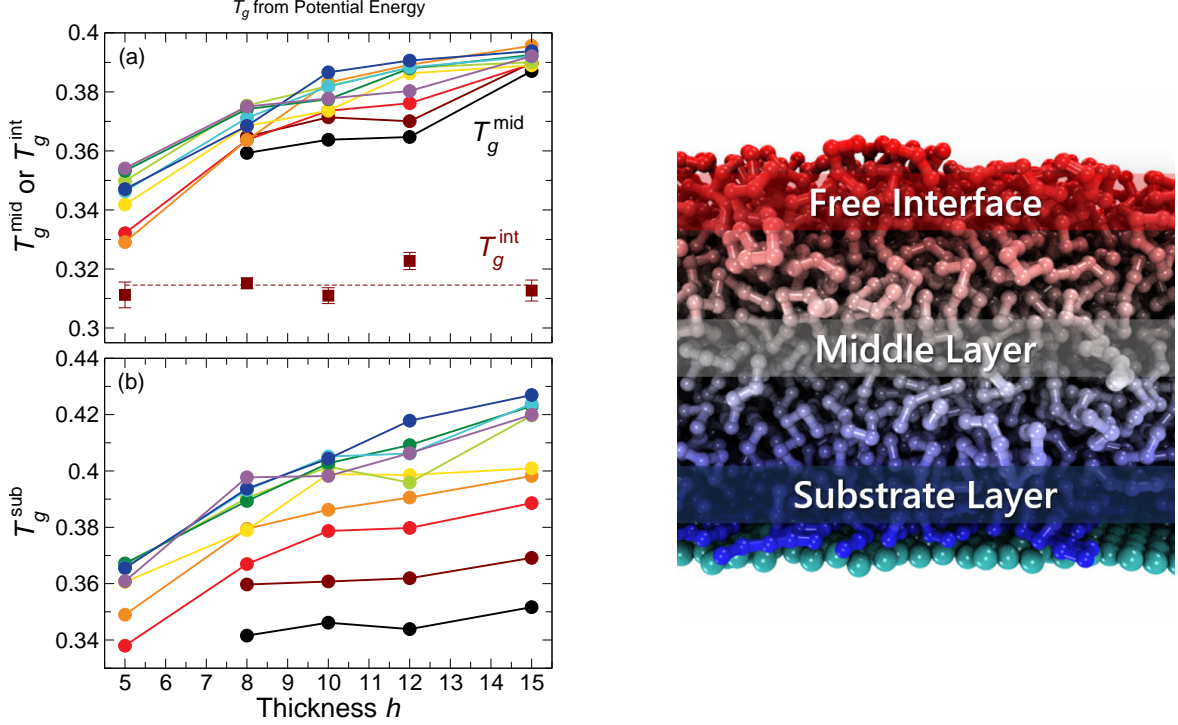

FIG. S2: The thermodynamic glass transition temperatures  $T_g$  from (a) middle film and free surface layers, and (b) substrate layer of the film, defined by excess potential energy, as a function of film thickness  $h$  for all  $\epsilon$  studied.  $T_g$  from  $U_{\text{sub}}$  decreases with decreasing film thickness. Similarly,  $T_g$  from  $U_{\text{mid}}$  decreases with decreasing film thickness for all  $\epsilon$ .  $T_g$  from  $U_{\text{int}}$  is nearly identical for all thicknesses and  $\epsilon$ . Therefore, we average  $T_g^{\text{int}}$  over all  $\epsilon$  for each film thickness and the error bars indicate the standard error of  $T_g^{\text{int}}$ . The picture illustrates the free interface, middle, and substrate layer of thin polymer film with a strongly interacting substrate; colors indicate the logarithmic scaled relaxation time from red (most mobile) to blue (least mobile).

the overall thermodynamic  $T_g$  estimates decrease as the films become thinner. We have also determined the thermodynamic  $T_g$  in the different regions of the film based on the density of these regions, leading to the same trends that we have found for the potential energy. This data is inherently noisier than the potential energy data, so we only show position dependent thermodynamic estimates of  $T_g$  here based on potential energy.

Most notably,  $T_g$  of the substrate layer ( $T_g^{\text{sub}}$ ) obtained from potential energy does not increase with decreasing film thickness, whereas the dynamically defined substrate  $T_g$  increases with decreasing film thickness (Fig. 5(b) in the paper). Thus, the data suggest that the ther-

modynamic measure of  $T_g$  decreases for thinner films, both for the film as a whole, as well as locally. A similar issue has been examined in Ref. [3]; the bound layer near the substrate acts as a compatible interface to the film interior and this bound layer effectively cloaks the film upper layer (everything except the substrate layer) from the substrate interaction. On heating, the upper layer exhibits glass transition before the bound substrate layer turns into fluid-like state. Since the thickness of the bound layer are only a few nanometers (see inset of Fig. 3 and Ref. [10]), the upper layer of the film dominates the overall thermodynamically defined  $T_g$ .

### III. DYNAMICAL DEFINITION OF $T_g$

Following Refs. 3, 11, we first define the overall relaxation time  $\tau_{\text{overall}}$  and the center of mass relaxation time  $\tau_{\text{cm}}$  of the polymer film by the time at which  $F_s(q_0, \tau)$  has decayed by a factor  $1/e$  relative to its plateau value  $A$ ; the plateau value  $A \approx 0.75$  is nearly constant for all films and temperatures studied, and so we can define  $F_s(q_0, \tau) = A/e \approx 0.28$ . To mimic the experimental criterion of a fixed relaxation time at  $T_g$ , we choose  $\tau(T_g) = 10^3$  (in LJ units), the same definition as in Refs. 3, 11; note that due to inherent differences in accessible time scales between simulation and experiment, this time scale is substantially smaller than that chosen experimentally, so that  $T_g$  from the simulation is substantially higher than would be obtained from standard experimental criteria. Despite the difference in the absolute time scale used, it is expected trend in the changes in  $T_g$  due to changing film thickness or interfacial interaction strength will be similar between simulation and experiment. The resulting  $T_g$  estimates for the film as a whole and for all film thicknesses  $h$  and polymer-substrate interaction strengths are shown in Fig. 1 (c) in the main text. A similar plot for  $T_g$  from the chain dynamics is shown in Fig. S3.

### IV. THE THICKNESS DEPENDENCE OF $T_g$

We use a Gibbs-Thomson inspired model [1] to fit the thickness dependent of  $T_g(h)$ ,

$$\frac{T_g(h)}{T_g(h \rightarrow \infty)} = 1 - \frac{l_p a}{h}, \quad (3)$$

where  $l_p \approx 1$  is the persistence length for spring-bead polymer model, and  $a$  is the fitting parameter. Note that the Keddie *et al.* [12] have proposed an empirical function for the  $T_g$

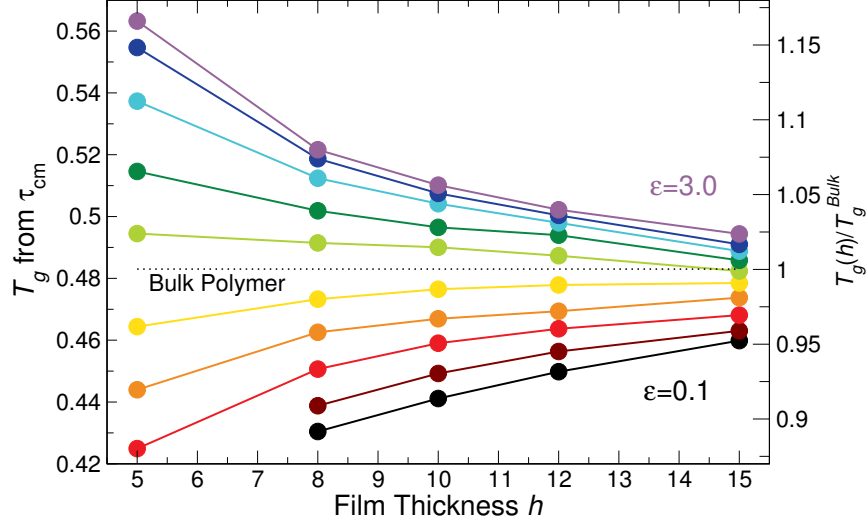

FIG. S3: Dynamic glass transition temperature  $T_g$  estimates of thin polymer films, defined from the relaxation time of the center of mass of polymers [ $\tau_{\text{cm}}(T_g) = 10^3$ ] plotted as a function of film thickness  $h$  for polymer-substrate interaction strengths  $\varepsilon = 0.1, 0.25, 0.5, 0.75, 1.0, 1.25, 1.5, 2.0, 2.5$  and  $3.0$ . On the right side of the vertical axis, we normalize  $T_g$  by the corresponding glass transition temperature of the bulk polymer  $T_g^{\text{Bulk}}$ .

shifts of thin polymer films,

$$T_g(h) = T_g^\infty \left[ 1 - \left( \frac{a}{h} \right)^\delta \right], \quad (4)$$

where  $\delta$  is the fitting exponent. Equation 3 is appropriate for the description of a second order phase transition, while Eq. 3 is motivated by a change in the cohesive energy of the film due to confinement 1, an argument for both the shift of the melting temperature and the glass transition temperature.

- 
- [1] P. Z. Hanakata, B. A. Pazmiño Betancourt, J. F. Douglas, and F. W. Starr, “A unifying framework to quantify the effects of substrate interactions, stiffness, and roughness on the dynamics of thin supported polymer films.,” *The Journal of Chemical Physics*, vol. 142, p. 234907, jun 2015.
- [2] S. Peter, H. Meyer, and J. Baschnagel, “Thickness-dependent reduction of the glass-transition temperature in thin polymer films with a free surface,” *Journal of Polymer Science Part B: Polymer Physics*, vol. 44, no. 20, pp. 2951–2967, 2006.

- [3] W. Zhang, J. F. Douglas, and F. W. Starr, “Effects of a bound substrate layer on the dynamics of supported polymer films,” *The Journal of Chemical Physics*, vol. 147, p. 044901, 2017.
- [4] J. Baschnagel and F. Varnik, “Computer simulations of supercooled polymer melts in the bulk and in confined geometry,” *Journal of Physics: Condensed Matter*, vol. 17, no. 32, p. R851, 2005.
- [5] F. Varnik and K. Binder, “Shear viscosity of a supercooled polymer melt via nonequilibrium molecular dynamics simulations,” *Journal of Chemical Physics*, vol. 117, no. 13, pp. 6336–6349, 2002.
- [6] S. Plimpton, “Fast parallel algorithms for short-range molecular dynamics,” *Journal of Computational Physics*, vol. 117, no. 1, pp. 1–19, 1995.
- [7] E. C. Glor, G. V. Angrand, and Z. Fakhraai, “Exploring the broadening and the existence of two glass transitions due to competing interfacial effects in thin, supported polymer films,” *Journal of Chemical Physics*, vol. 146, p. 203330, may 2017.
- [8] S. Kawana and R. A. L. Jones, “Character of the glass transition in thin supported polymer films,” *Physical Review E*, vol. 63, p. 021501, Jan 2001.
- [9] Y. Zhang and Z. Fakhraai, “Decoupling of surface diffusion and relaxation dynamics of molecular glasses,” *Proceedings of the National Academy of Sciences*, vol. 114, no. 19, pp. 4915–4919, 2017.
- [10] S. Napolitano, E. Glynos, and N. B. Tito, “Glass transition of polymers in bulk, confined geometries, and near interfaces,” *Reports on Progress in Physics*, vol. 80, p. 036602, mar 2017.
- [11] F. W. Starr, J. F. Douglas, D. Meng, and S. K. Kumar, “Bound layers cloak nanoparticles in strongly interacting polymer nanocomposites,” *ACS Nano*, vol. 10, no. 12, pp. 10960–10965, 2016.
- [12] A. Richard *et al.*, “Interface and surface effects on the glass-transition temperature in thin polymer films,” *Faraday Discussions*, vol. 98, pp. 219–230, 1994.
